# Supplementary figures and images for: Clinical characteristics and risk factors for survival in affected offspring of von Hippel-Lindau disease patients
Source: HighWire-hosted journal article supplement (doi:10.1136/jmedgenet-2021-108216), 2021-12-16

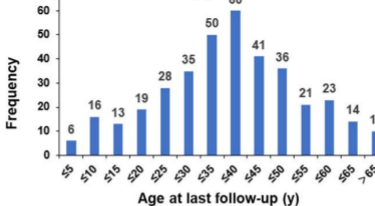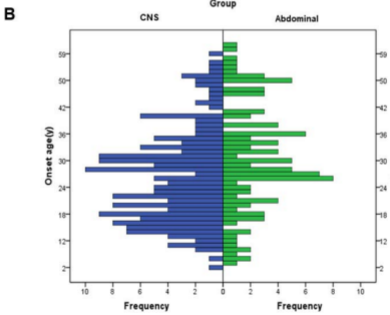

Supplement: jmedgenet-2021-108216supp002_data_supplement.pdf [file jmedgenet-2021-108216supp002_data_supplement.pdf]

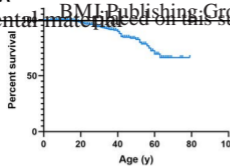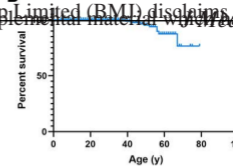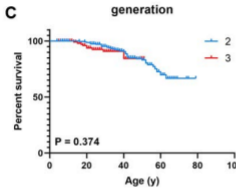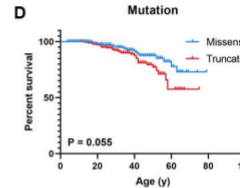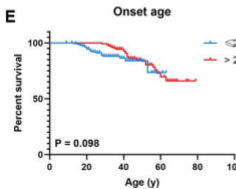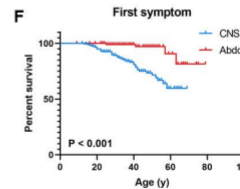

Supplement: jmedgenet-2021-108216supp005_data_supplement.pdf [file jmedgenet-2021-108216supp005_data_supplement.pdf]
